# Supplementary material
Source: publisher site journal article supplement (https://www.spandidos-publications.com/3634/downloadSupplementary)

Figure S1. CTBP1 knockdown inhibits the viability of AGS and HGC-27 cells. The Cell Counting Kit-8 assay was performed to detect the viability of (A) AGS and (B) HGC-27 cells after treatment with different doses of DDP. \* $P < 0.05$ , \*\* $P < 0.01$  vs. siNC. CTBP1, C-terminal-binding protein 1; DDP, cisplatin; NC, negative control; si, small interfering RNA.

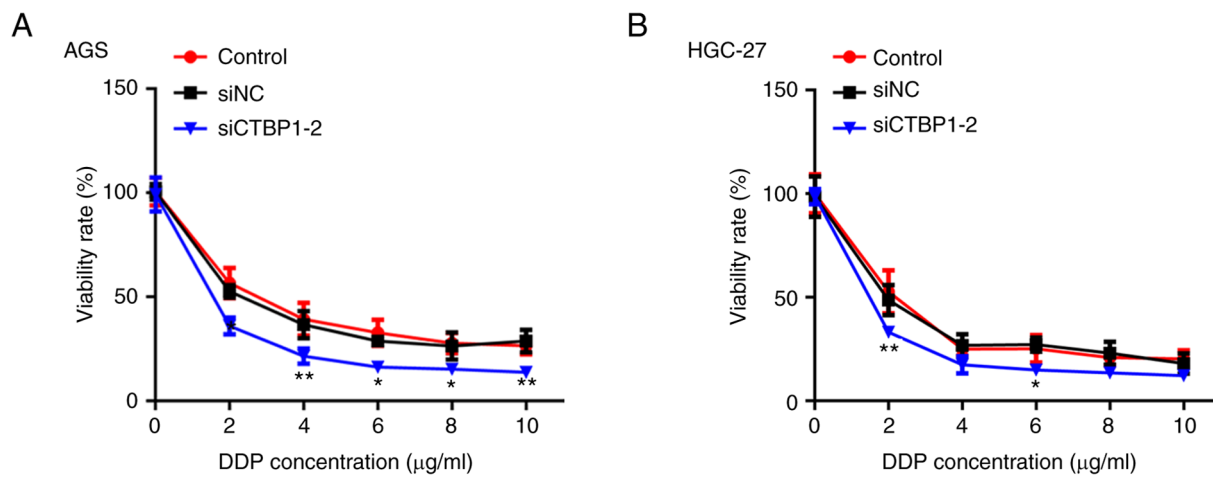

Supplement: Supplementary file 1 [file downloadSupplementary]
